# Supplementary material for: Viewing Art in Different Contexts
Source: PubMed Central journal article supplement (PMC7142233; doi:10.3389/fpsyg.2020.00569), 2020-04-02
Supplement: Data_Sheet_1.pdf [file Data_Sheet_1.pdf]

## Supplementary Materials

Fixation Location Heatmaps for all artworks in the three different viewing conditions. Each panel shows the total number of fixations at each viewed location (green =1 fixation; red=5 fixations).

# nIA-1 - Total Fixation Count

## Museum

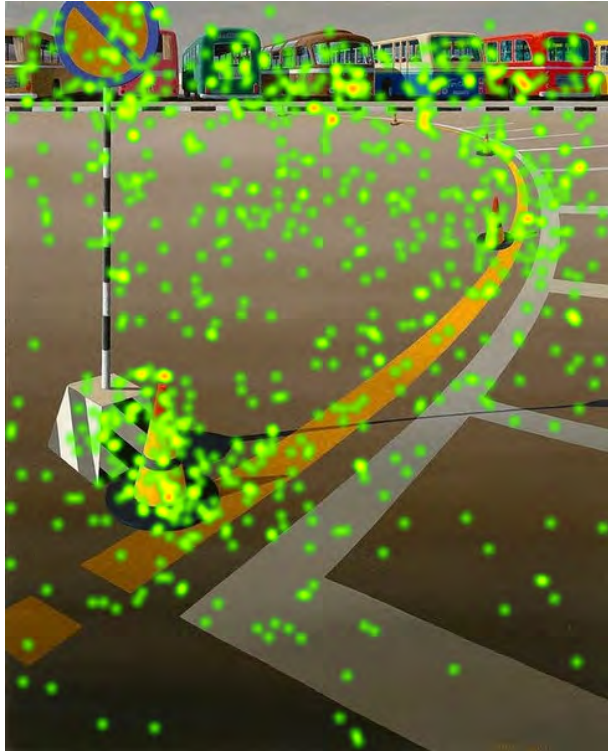

## Screen – Full size

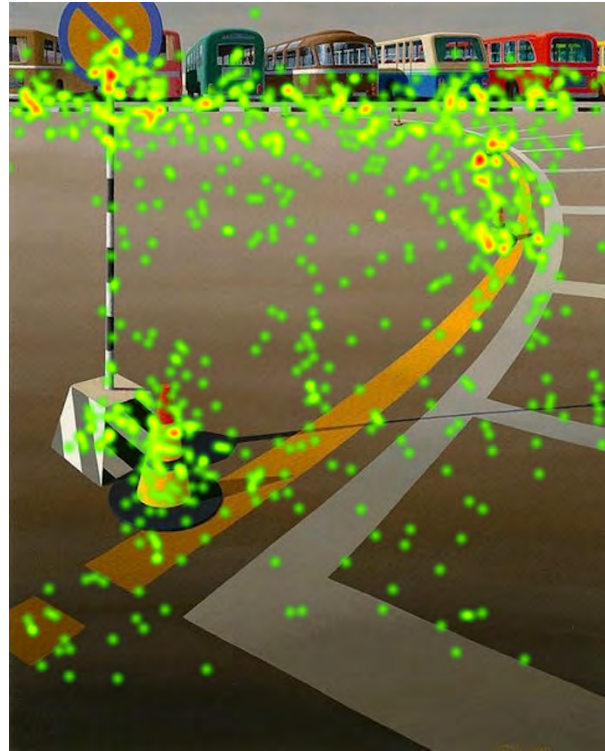

## Screen – Relative Size

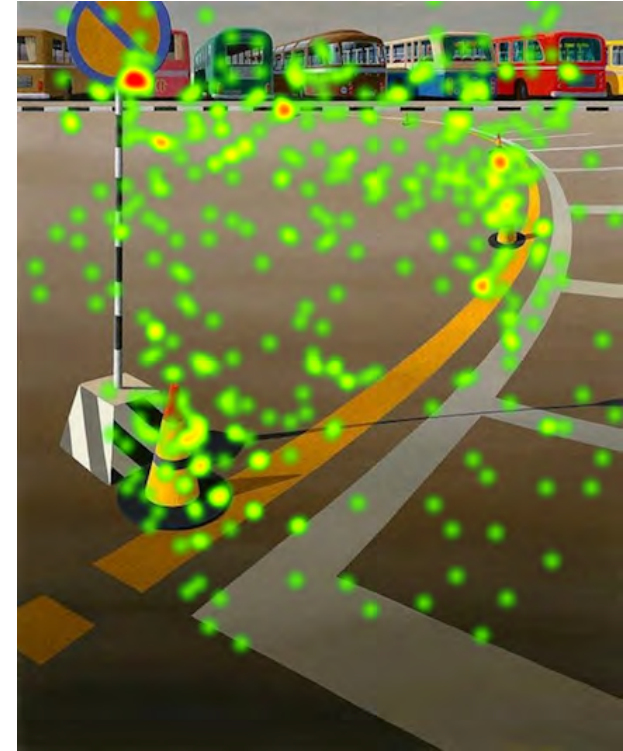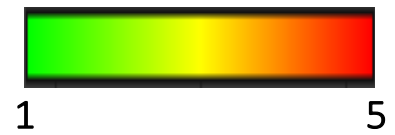

# nIA-2 - Total Fixation Count

Museum

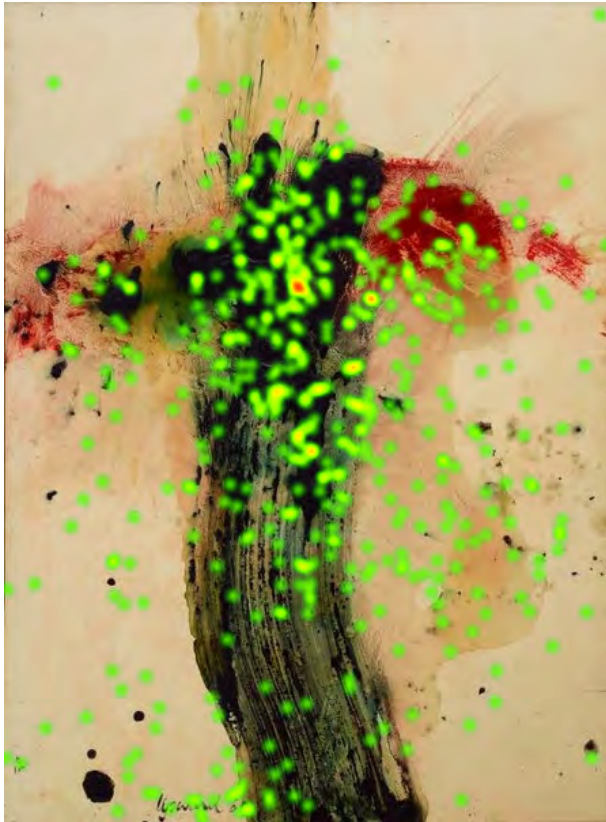

Screen – Full size

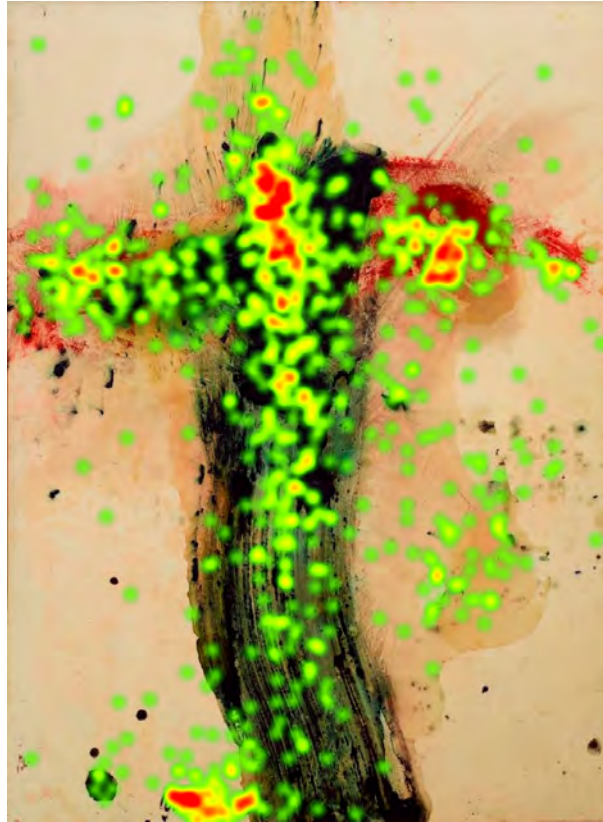

Screen – Relative Size

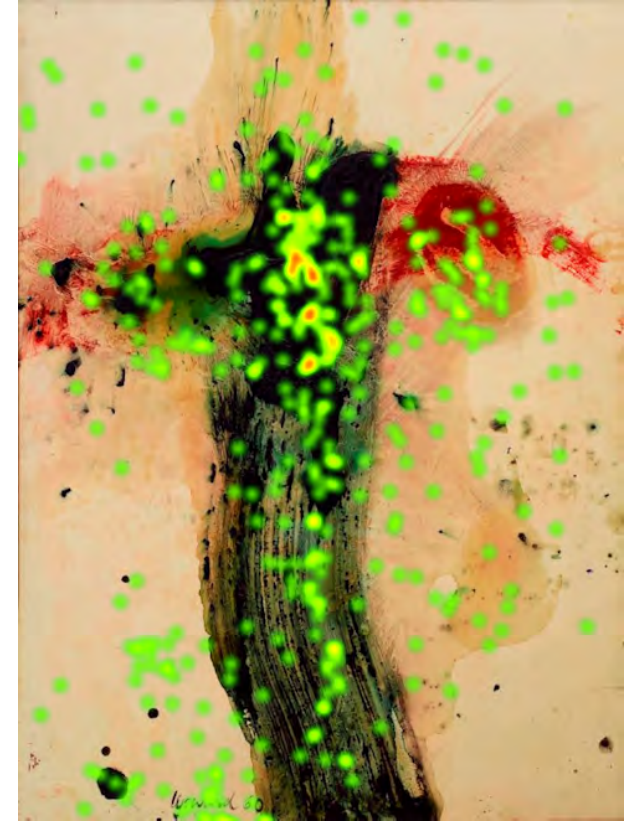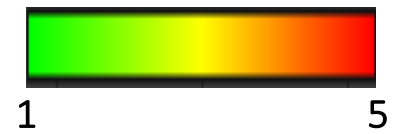

# nIA-4 - Total Fixation Count

Museum

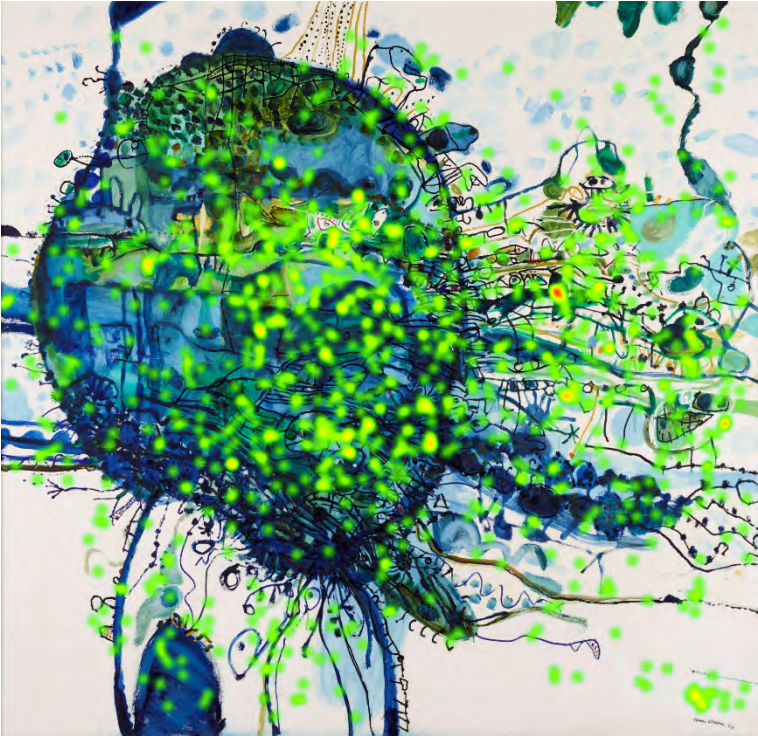

Screen – Full size

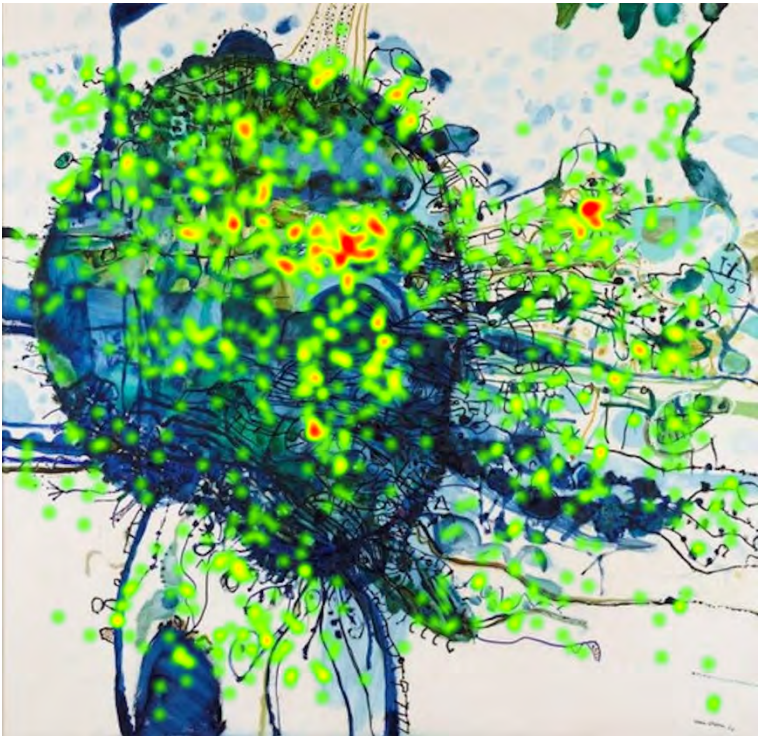

Screen – Relative Size

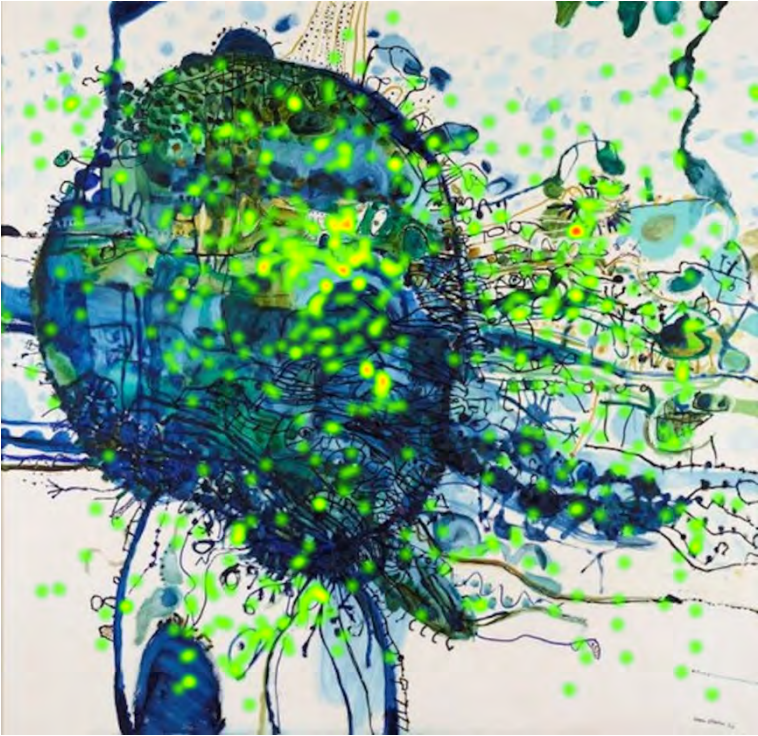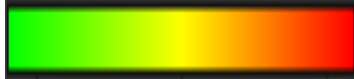

1

5

# nIA-3 - Total Fixation Count

**Museum**

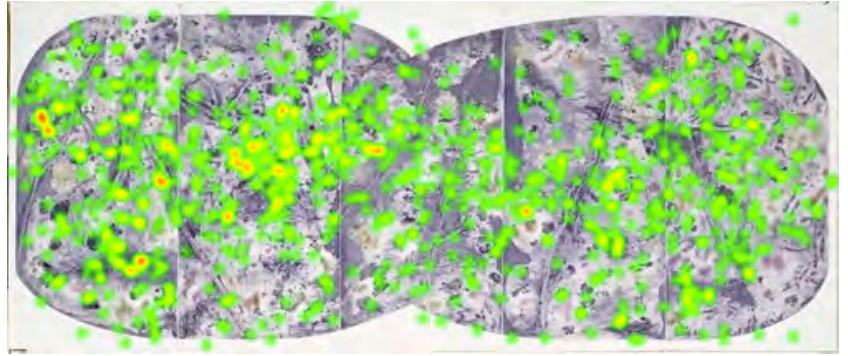

**Screen – Full size**

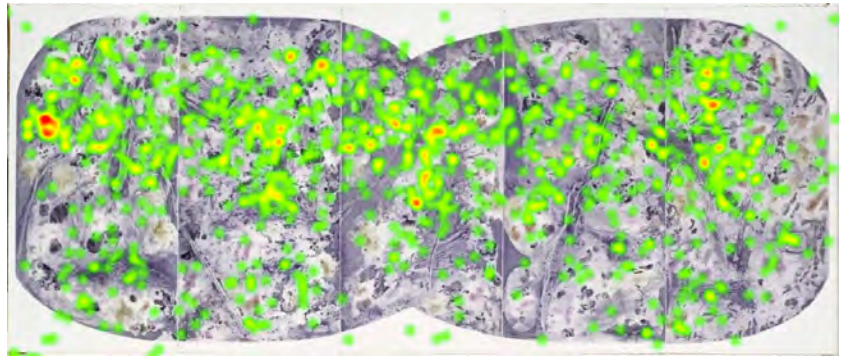

**Screen – Relative Size**

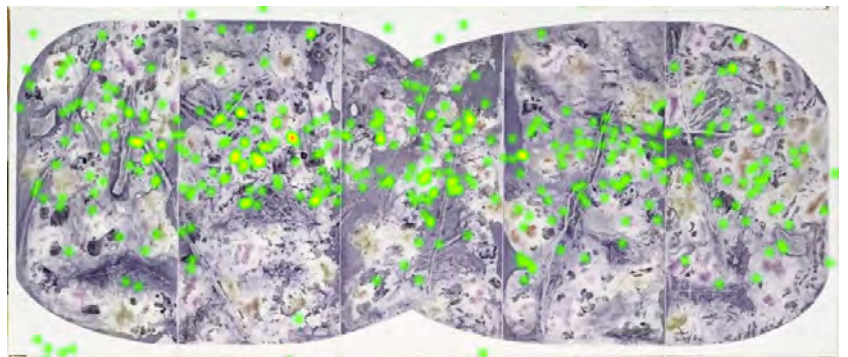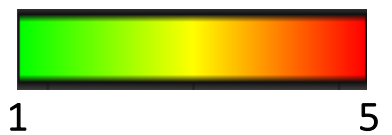

# nIA-5 - Total Fixation Count

**Museum**

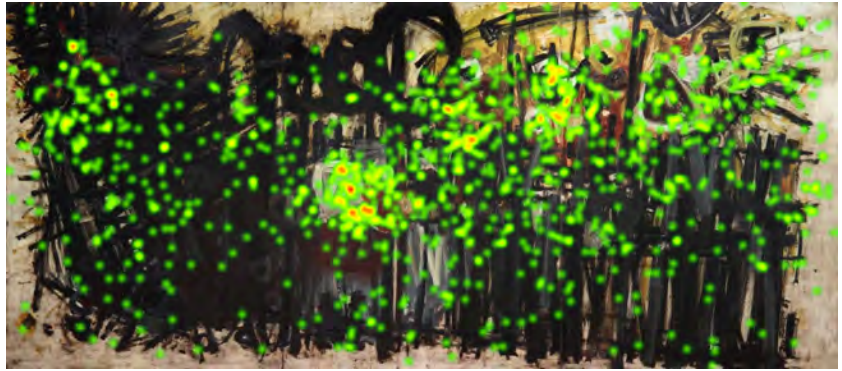

**Screen – Full size**

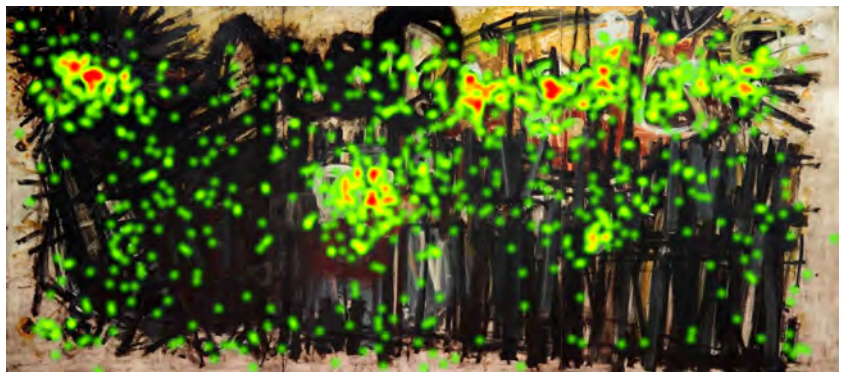

**Screen – Relative Size**

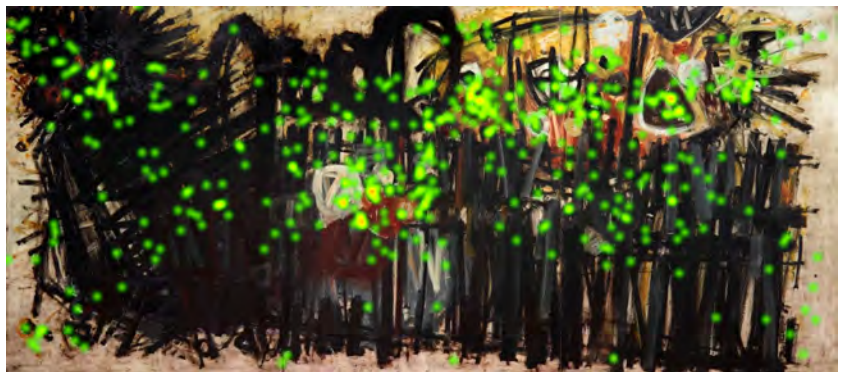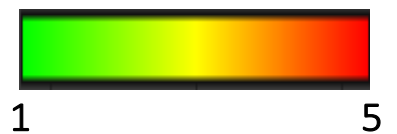

# nIA 6 - Total Fixation Count

**Museum**

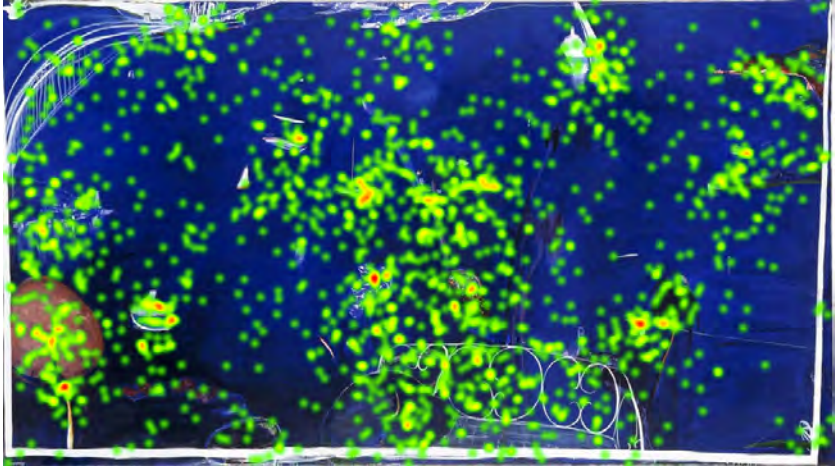

**Screen – Full size**

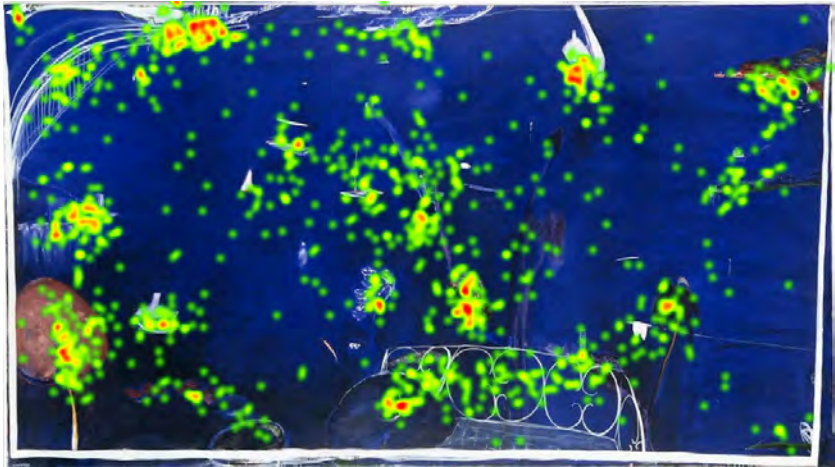

**Screen – Relative Size**

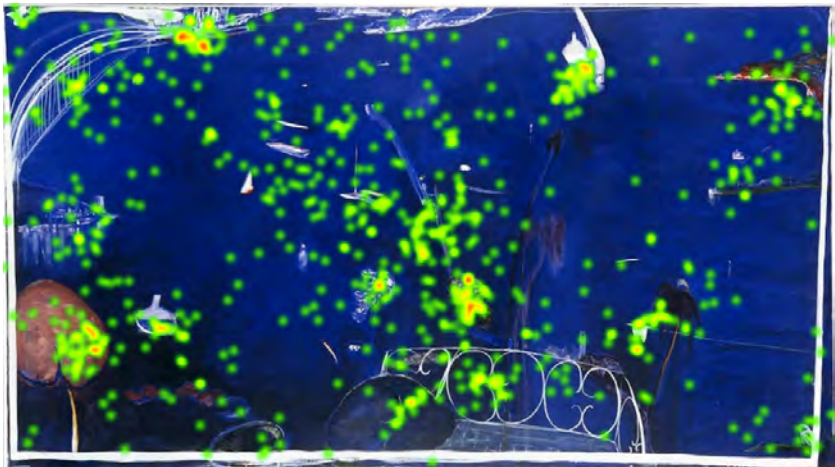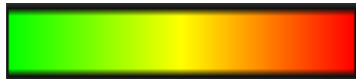

1

5

# IA-1 - Total Fixation Count

Museum

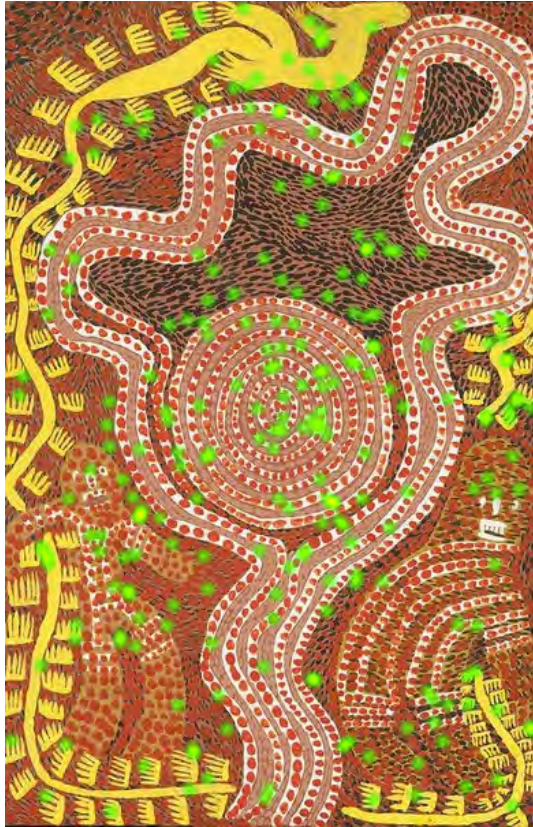

Screen – Full size

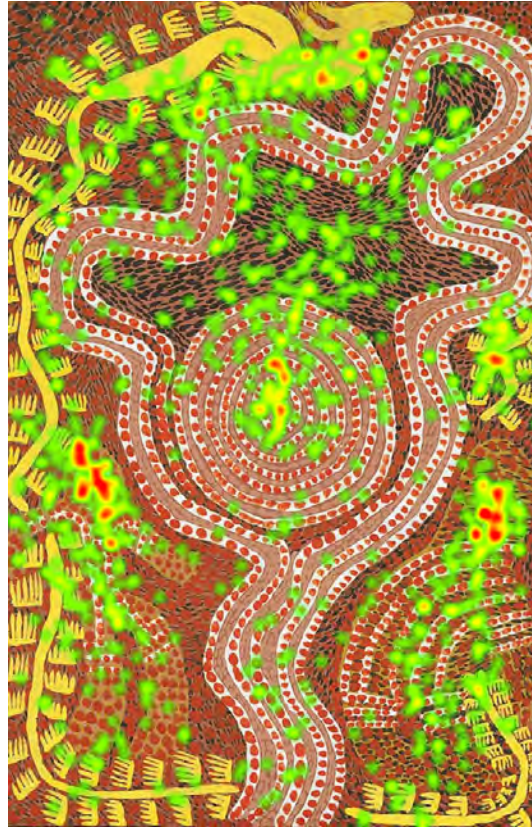

Screen – Relative Size

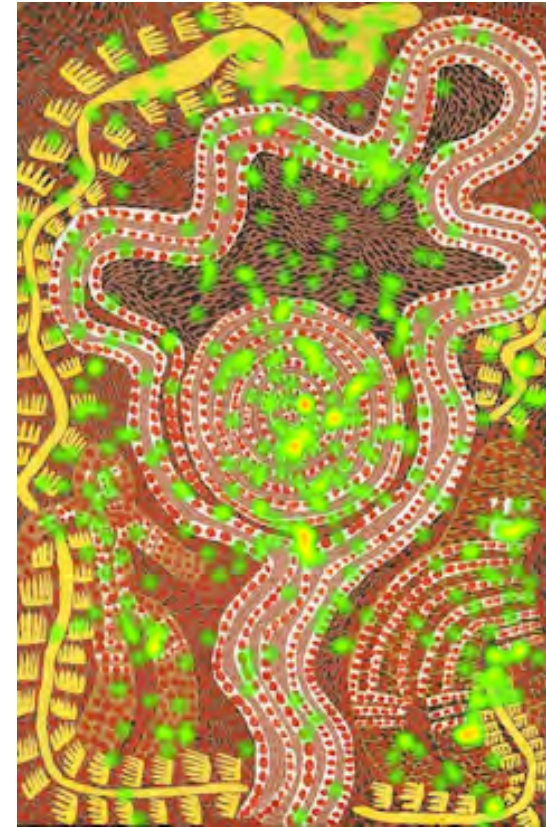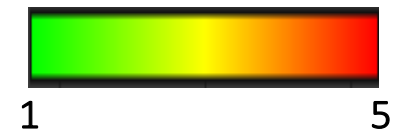



# IA-2 - Total Fixation Count

Museum

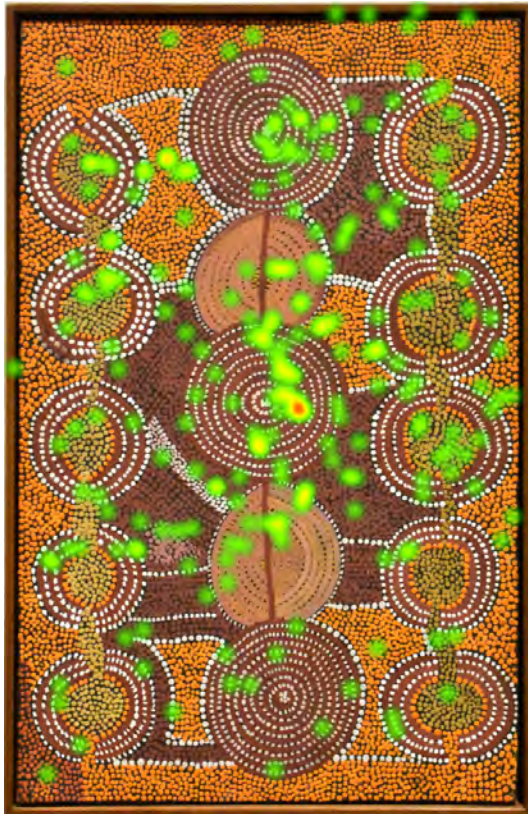

Screen – Full size

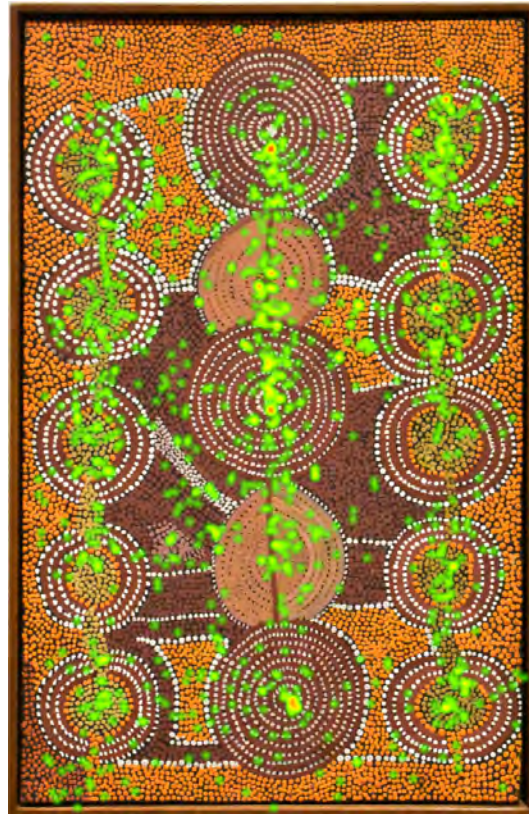

Screen – Relative Size

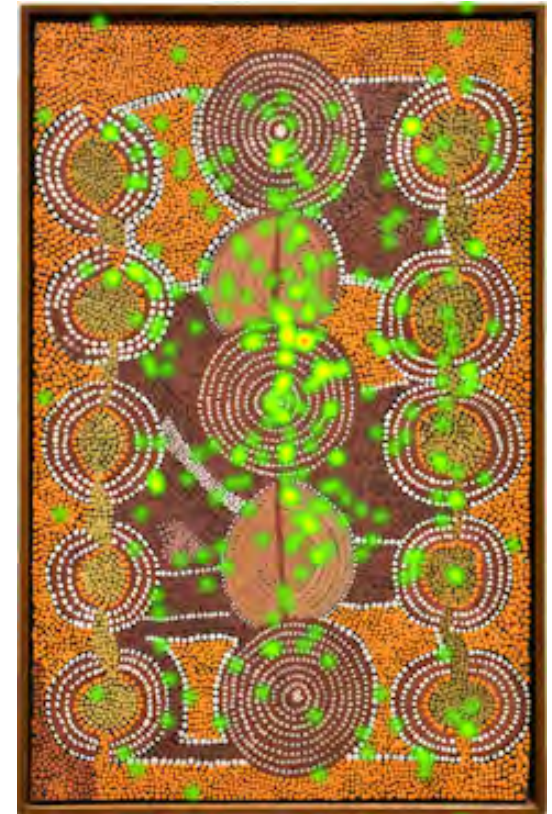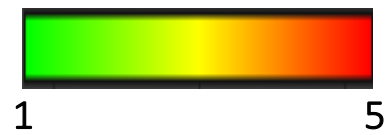

# IA-3 - Total Fixation Count

## Museum

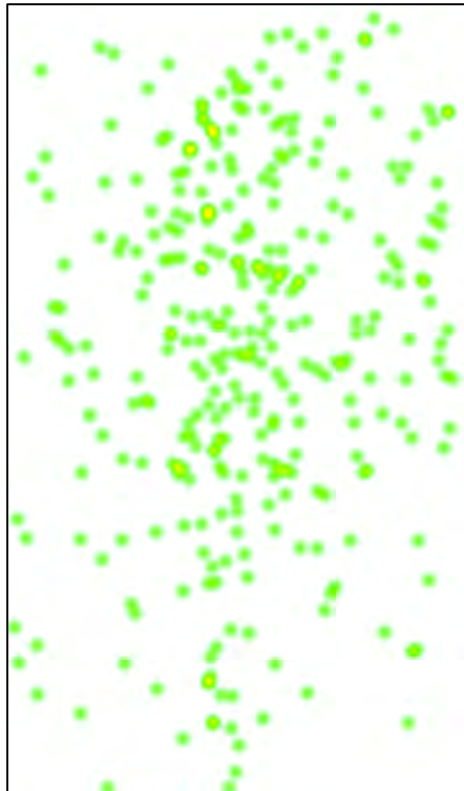

## Screen – Full size

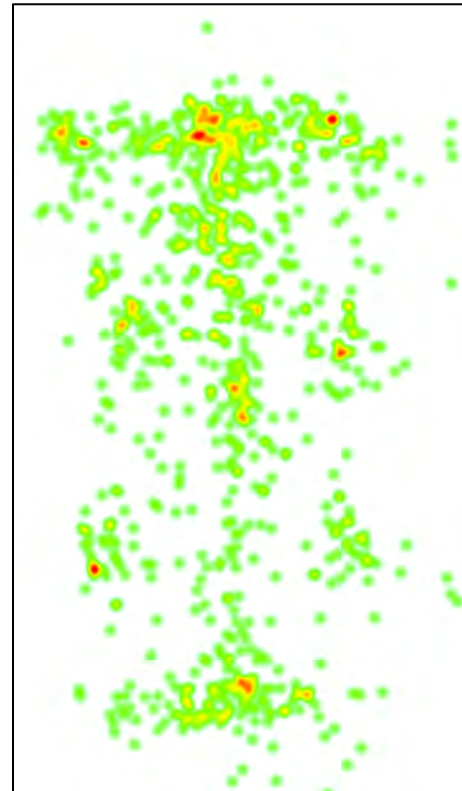

## Screen – Relative Size

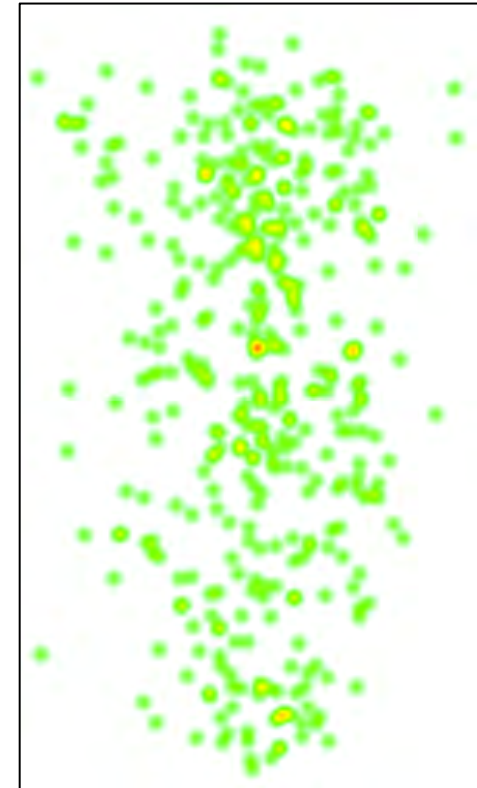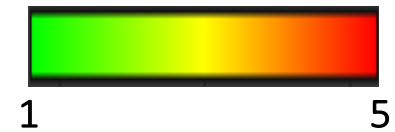

# IA-4 - Total Fixation Count

Museum

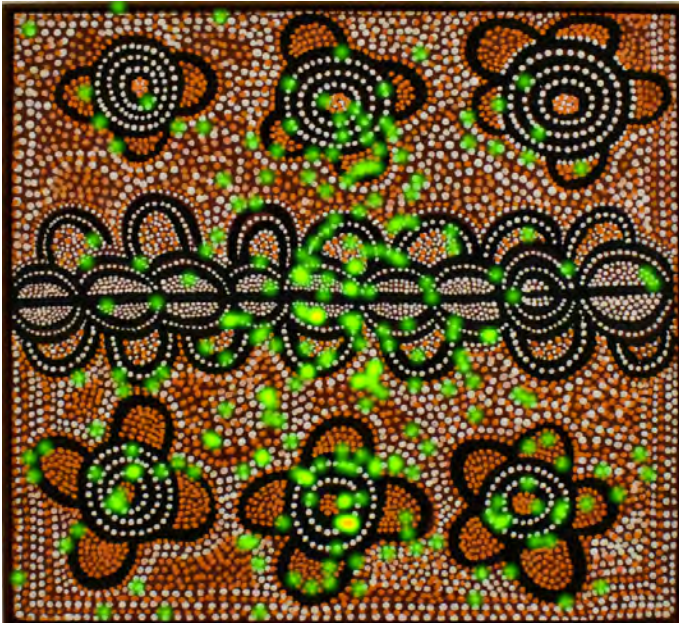

Screen – Full size

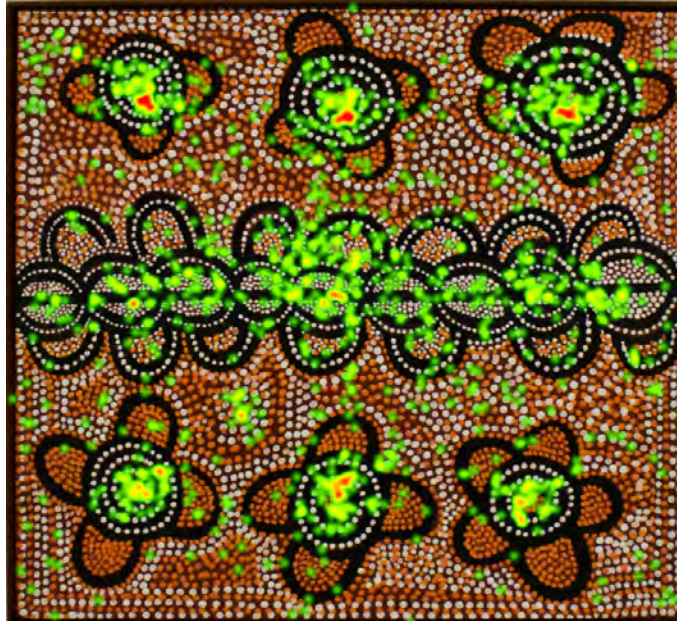

Screen – Relative Size

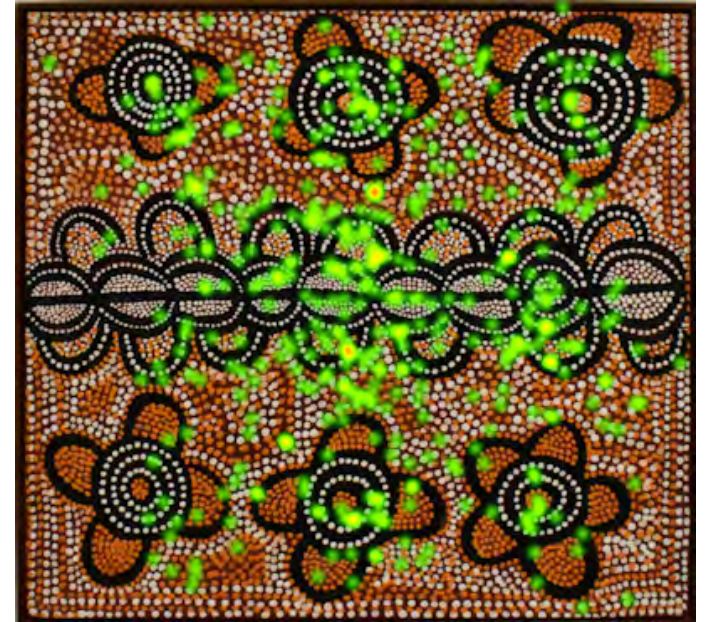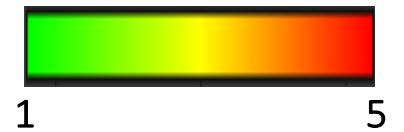

# IA-5 - Total Fixation Count

Museum

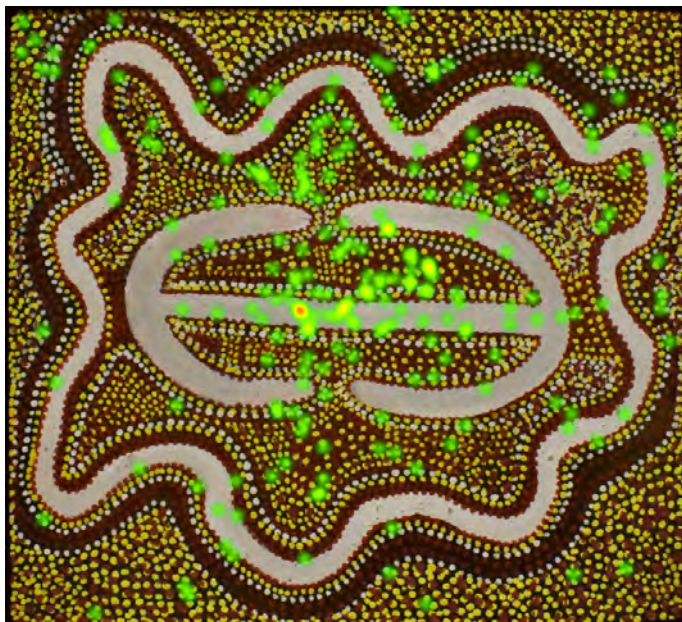

Screen – Full size

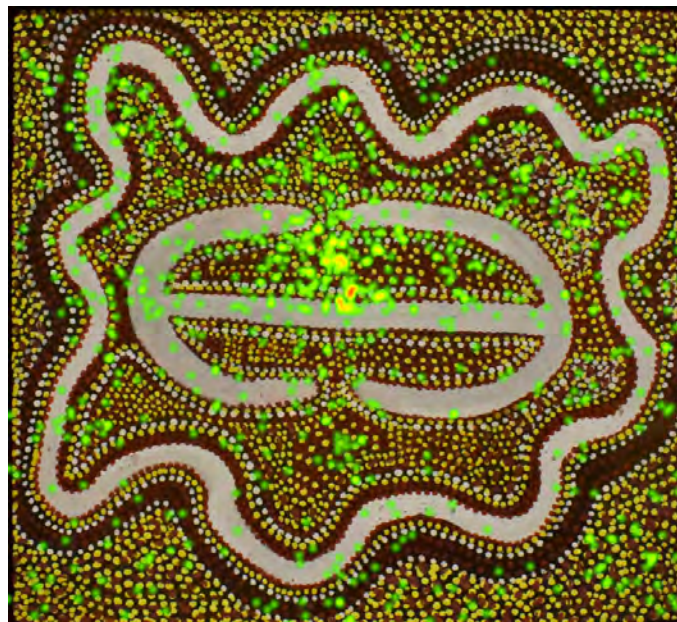

Screen – Relative Size

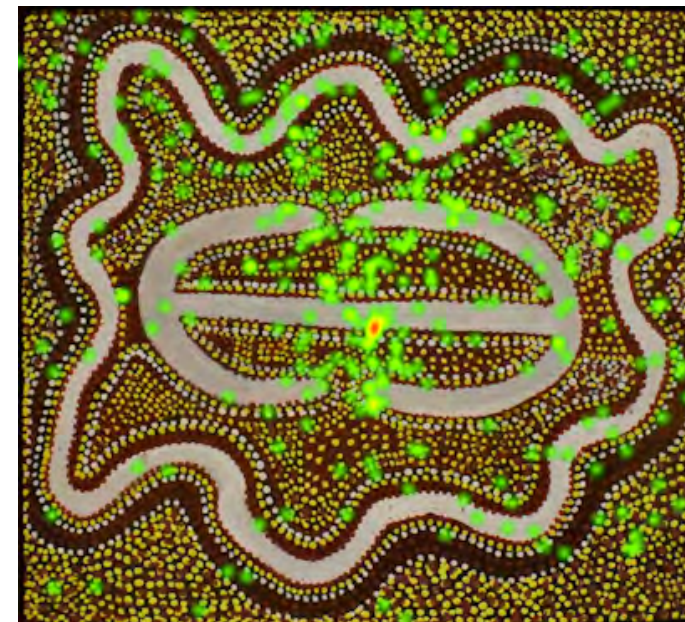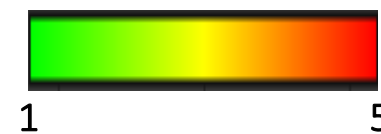

IA-6 - Total Fixation Count

Museum

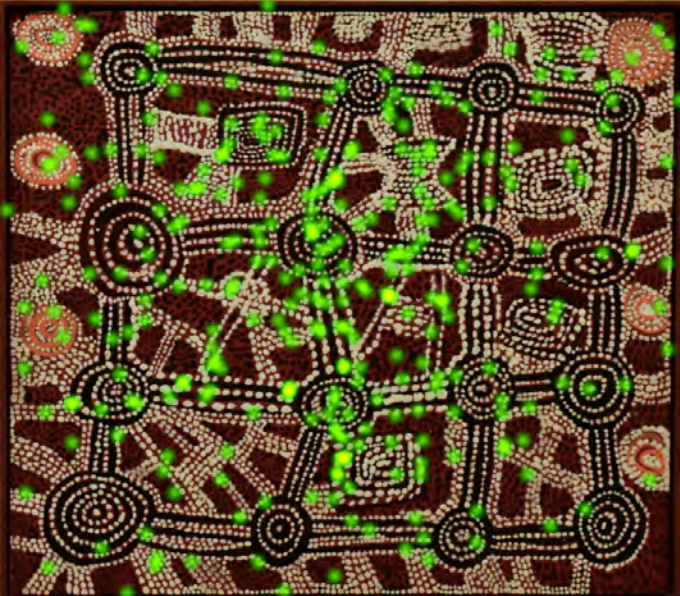

Screen – Full size

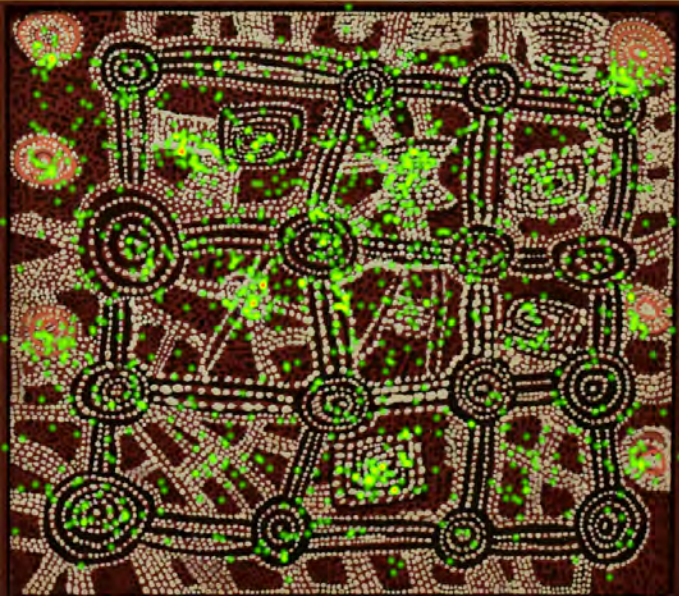

Screen – Relative Size

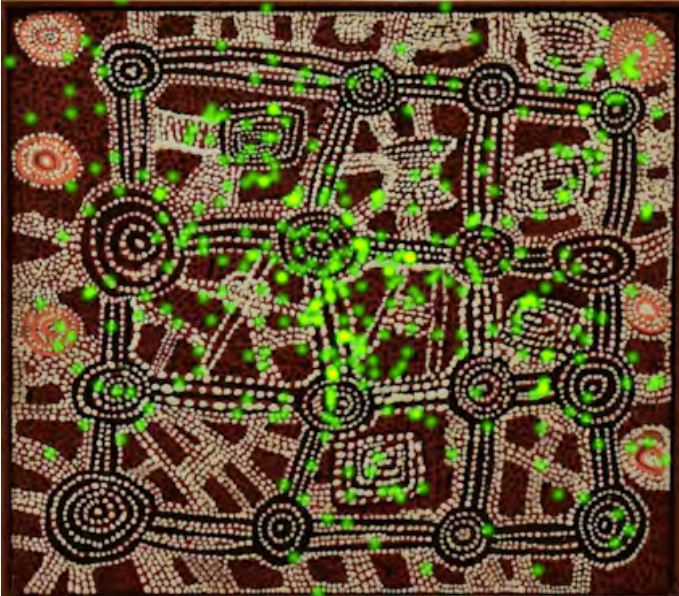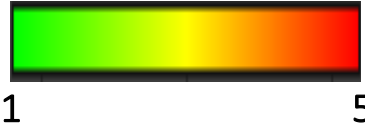

# IA-7 - Total Fixation Count

**Museum**

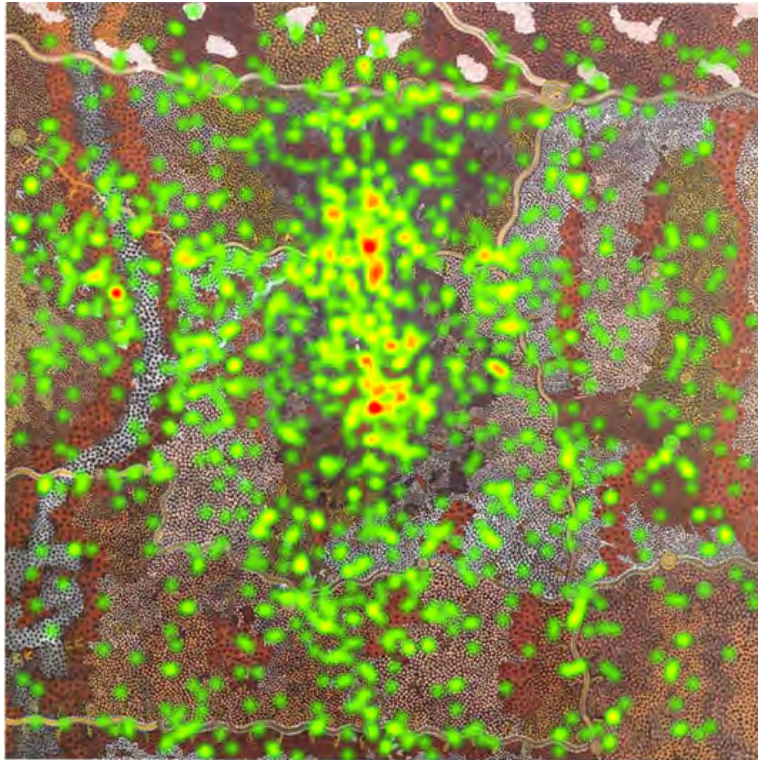

**Screen – Full size**

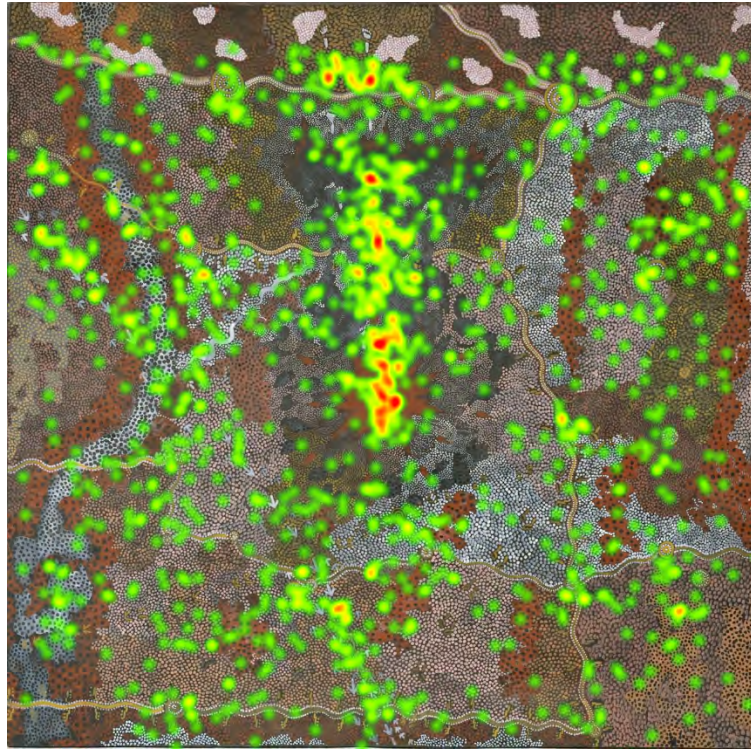

**Screen – Relative Size**

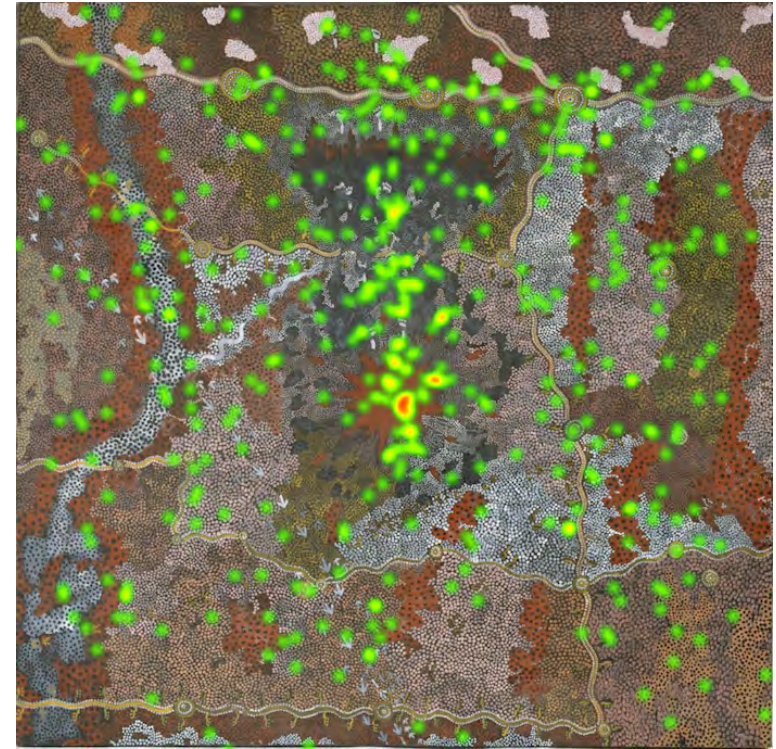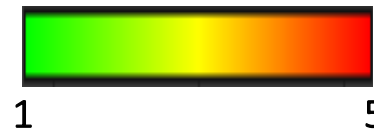

# IA-7 - Total Fixation Count

Museum

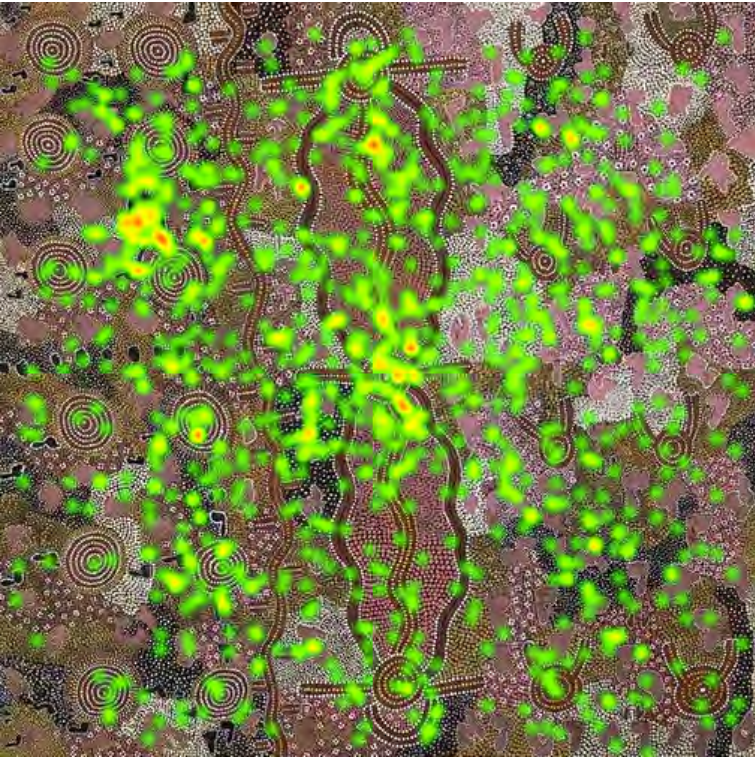

Screen – Full size

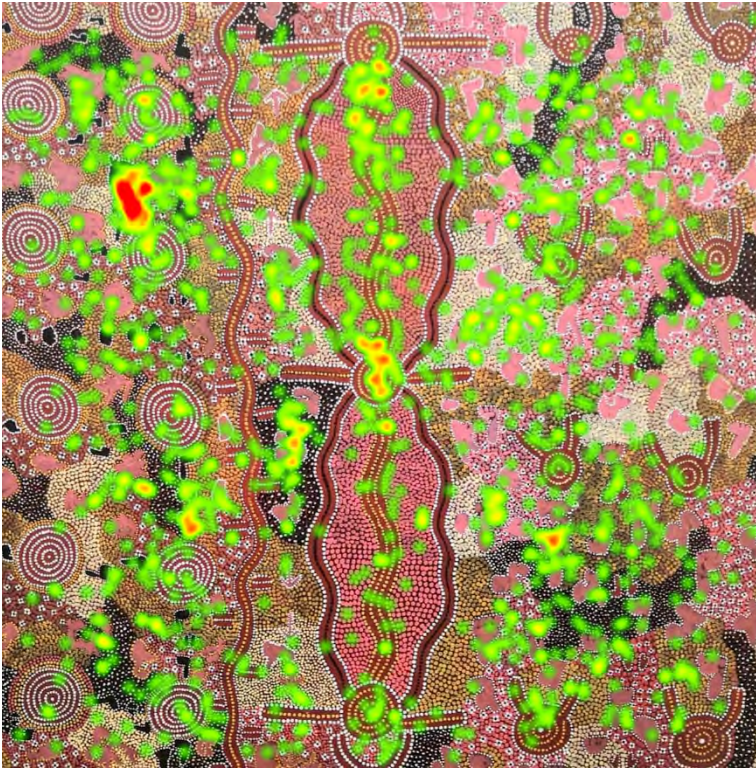

Screen – Relative Size

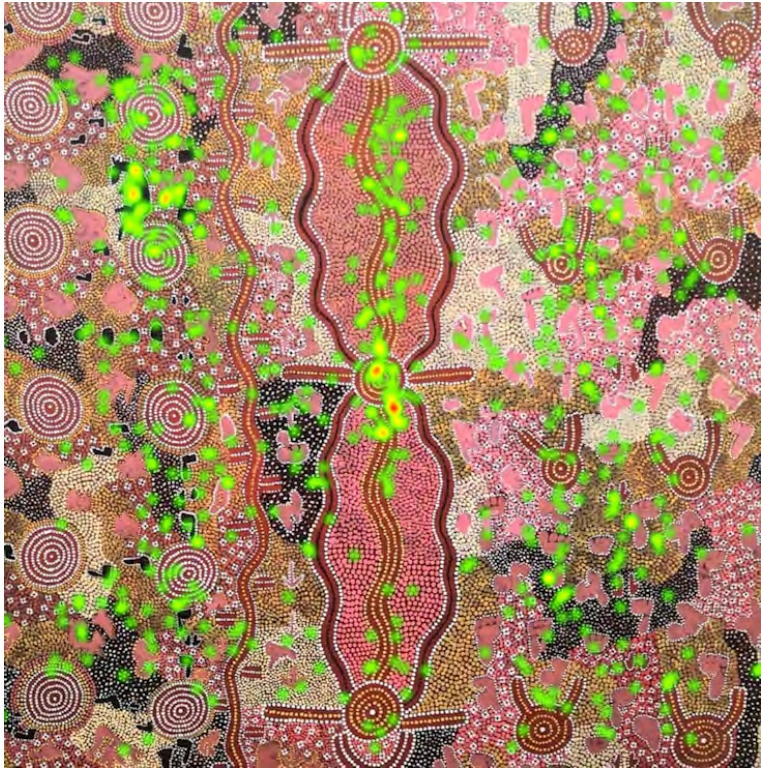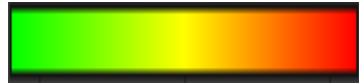

1

5

# IA-9 - Total Fixation Count

**Museum**

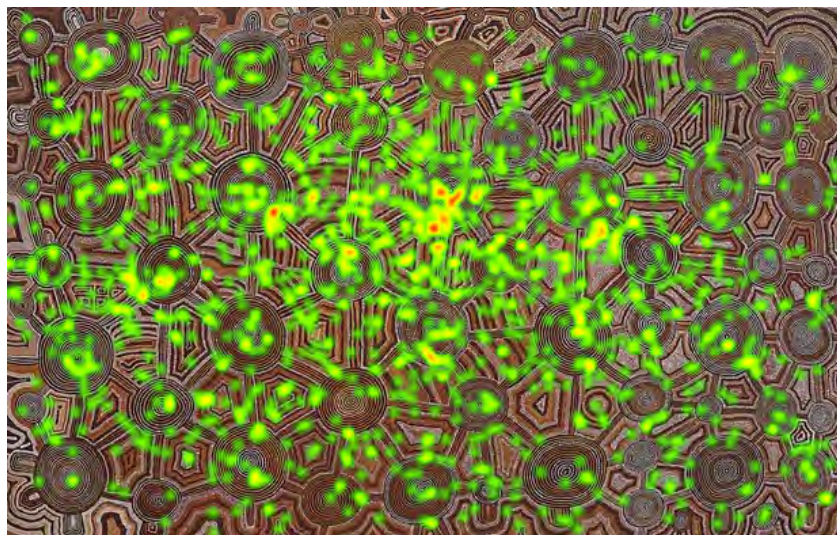

**Screen – Full size**

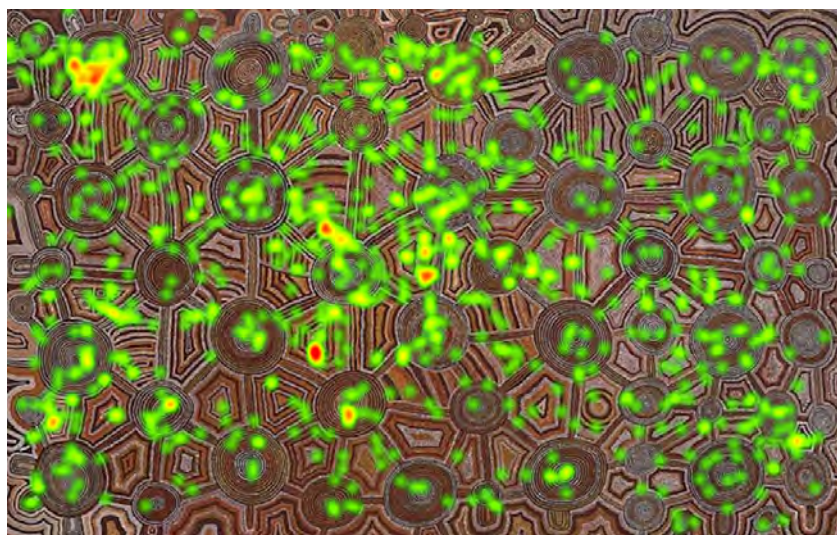

**Screen – Relative Size**

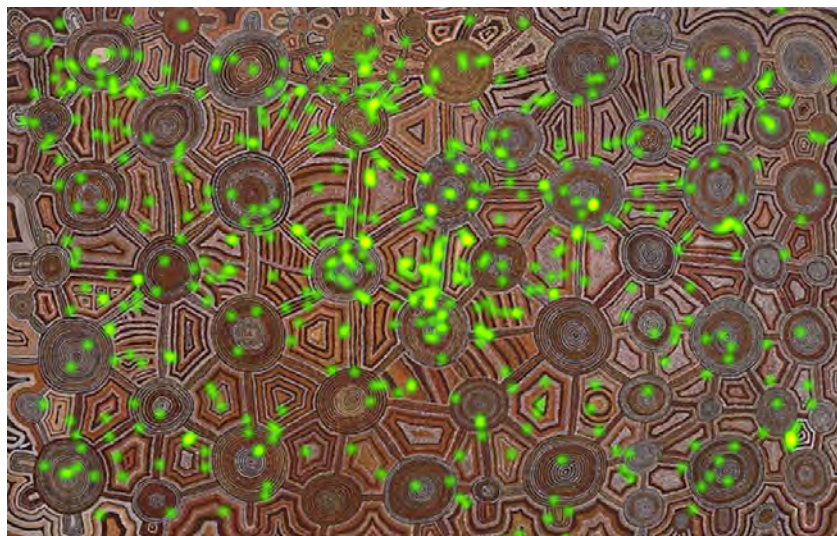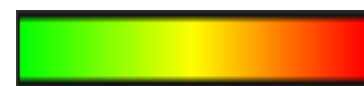

1

5
